# Supplementary material for: Genome scans of facial features in East Africans and cross-population comparisons reveal novel associations
Source: PLoS Genet. 2021 Aug 19;17(8):e1009695. doi: 10.1371/journal.pgen.1009695 (PMC8375984; doi:10.1371/journal.pgen.1009695)
Supplement: S2 Table — (XLSX) [file pgen.1009695.s010.xlsx]

## Sheet: Sheet1
S2 Table. The number of principal components retained after parallel analysis for each facial segment
Facial segment	Number of PCs	Percentage variance
1	57	96.8884
2	47	97.0914
3	37	96.535
4	38	97.0658
5	40	97.2839
6	33	97.5681
7	29	97.3002
8	29	97.2886
9	35	97.129
10	27	97.2912
11	37	97.3347
12	19	97.2308
13	29	97.745
14	11	96.5553
15	29	97.0408
16	23	97.4194
17	15	96.5094
18	28	97.2359
19	29	97.5787
20	28	97.4041
21	11	96.2226
22	30	97.4655
23	32	97.9009
24	10	96.2156
25	17	98.1215
26	16	98.1293
27	23	97.9733
28	9	97.0548
29	9	96.5722
30	21	97.1958
31	20	97.181
32	17	97.3705
33	16	97.4408
34	11	96.4998
35	10	95.9924
36	21	97.403
37	21	97.3179
38	20	97.5991
39	21	97.762
40	18	97.4239
41	24	97.2549
42	9	98.6036
43	16	97.6875
44	23	97.4396
45	19	97.3807
46	20	97.3825
47	20	97.6276
48	7	95.67
49	7	95.3943
50	10	96.7403
51	12	97.4532
52	12	97.9393
53	10	98.0349
54	14	97.332
55	17	97.3925
56	7	97.7322
57	6	96.1927
58	7	96.7599
59	8	97.7137
60	15	97.8795
61	18	97.5624
62	13	97.0622
63	15	96.8164
