# Supplementary material for: Genome scans of facial features in East Africans and cross-population comparisons reveal novel associations
Source: PLoS Genet. 2021 Aug 19;17(8):e1009695. doi: 10.1371/journal.pgen.1009695 (PMC8375984; doi:10.1371/journal.pgen.1009695)
Supplement: S4 Table — (XLSX) [file pgen.1009695.s012.xlsx]

## Sheet: Sheet1
S4 Table. In silico replication of European hits in the Tanzania dataset
European cohort									Tanzania replication
SNP	Chr	Pos (hg19)	Locus	A1	A2	A1freq European	Best P	Best Segment	A1freq Tan	P (T1)	P (T2)	Best segment (T2)	P (T3)	Best segment (T3)
rs76244841	1	2775953	1p36.32	A	G	0.419043	1.479e-08	30	0.2841	0.372987	0.0463805	MOD53	3.32302e-08	MOD27
rs1572037	1	3254369	1p36.32	C	T	0.277399	2.64292e-22	2	0.4246	0.152176	9.92254e-05	MOD55	3.32302e-08	MOD27
rs742071	1	18979874	1p36.13	T	G	0.402313	1.07217e-15	11	0.4232	0.270839	0.0128089	MOD62	1.21479e-05	MOD36
rs4912082	1	19716796	1p36.13	C	T	0.29017	3.22111e-08	10	0.3525	0.654215	0.0347061	MOD7	1.84188e-05	MOD34
rs16834081	1	31292641	1p35.2	C	T	0.0911339	2.35101e-09	11	0.06958	0.0322099	0.0155495	MOD54	3.65808e-07	MOD18
rs199971562	1	56604984	1p32.2	C	CTG	0.41528	1.19611e-11	30	0.2889	0.314316	0.00922174	MOD41	1.49004e-05	MOD9
rs4916071	1	61020499	1p32.1	A	G	0.475481	1.93252e-51	11	0.1135	0.158279	0.0192743	MOD63	2.4232e-05	MOD42
rs79297754	1	75634995	1p31.1	A	G	0.0462507	9.68323e-10	61	0.2694	4.1284e-05	0.000621939	MOD43	9.95905e-06	MOD6
rs12070922	1	81708846	1p31.1	A	G	0.119973	3.69509e-09	11	0.1733	0.897018	0.0840165	MOD38	1.02732e-06	MOD31
rs7513680	1	119150968	1p12	C	T	0.379043	7.03161e-13	51	0.1466	0.0259419	0.0620667	MOD54	1.33129e-06	MOD53
rs3936018	1	119682370	1p12	C	T	0.235681	8.00911e-58	14	0.2026	4.73078e-07	0.0042867	MOD53	1.33129e-06	MOD53
rs17023457	1	119875730	1p12	C	T	0.173861	3.25996e-15	48	NA	NA	NA	NA	1.33129e-06	MOD53
rs11589479	1	155033308	1q22	A	G	0.149058	3.88954e-09	1	NA	NA	NA	NA	1.6298e-08	MOD41
rs577676	1	170587340	1q24.2	T	C	0.449451	1.08373e-08	51	0.8407	0.279154	0.00705339	MOD32	9.73307e-07	MOD45
rs10919462	1	170734890	1q24.2	A	C	0.447368	2.691e-11	9	0.4149	0.145783	0.000987247	MOD42	2.49127e-07	MOD18
rs2759656	1	197352969	1q31.3	A	G	0.218965	1.16919e-79	53	0.1997	0.138192	0.0103901	MOD62	6.63034e-06	MOD16
rs12039502	1	221197709	1q41	C	G	0.301376	1.9171e-10	13	0.3897	0.0839383	0.011936	MOD32	1.58897e-06	MOD8
rs7558413	2	18721662	2p24.2	G	A	0.420574	1.25463e-10	1	0.08434	0.515318	0.0185949	MOD7	7.50917e-06	MOD63
rs6715010	2	19277788	2p24.1	T	C	0.470387	1.34486e-14	22	0.2442	8.10043e-05	0.00148818	MOD26	5.33547e-07	MOD63
rs79037251	2	19503015	2p24.1	T	G	0.149173	9.46093e-11	24	0.01939	0.816712	0.0208596	MOD20	5.33547e-07	MOD63
rs1427539	2	19773420	2p24.1	C	T	0.34989	2.48497e-09	7	0.4452	0.00645634	0.00460222	MOD5	5.48197e-07	MOD36
rs6740960	2	42181679	2p21	A	T	0.485812	3.39101e-36	1	0.1686	0.00858185	7.45311e-05	MOD1	4.07298e-06	MOD50
rs10189338	2	42238622	2p21	C	T	0.269038	2.48865e-08	11	0.6915	0.92735	0.0198022	MOD24	4.07298e-06	MOD50
rs7590268	2	43540125	2p21	G	T	0.238917	1.14181e-08	29	0.157	0.333855	0.0343646	MOD31	5.34693e-07	MOD40
rs921119	2	45272812	2p21	C	T	0.296288	1.41947e-46	36	0.04854	0.0285918	0.0104471	MOD60	1.35088e-06	MOD59
rs35395759	2	45350661	2p21	T	C	0.27987	3.58892e-10	44	0.02699	0.509153	0.125339	MOD46	1.35088e-06	MOD59
rs1367228	2	56112440	2p16.1	A	C	0.436682	6.36897e-09	30	0.8225	0.999532	0.00951503	MOD22	3.52228e-05	MOD59
rs13035645	2	60633463	2p16.1	A	T	0.312298	2.44473e-08	27	0.0378	0.49932	0.0523401	MOD33	9.17866e-07	MOD39
rs6546175	2	65976905	2p14	T	C	0.383879	4.75329e-12	58	0.3417	0.523695	0.000291171	MOD59	7.01235e-06	MOD20
rs3891585	2	66756976	2p14	A	G	0.382995	3.78128e-10	15	0.4739	0.313158	0.0598231	MOD40	2.2001e-06	MOD52
rs11675008	2	67916875	2p14	A	G	0.372943	2.77706e-08	49	0.7123	0.49304	0.00860438	MOD61	9.16952e-07	MOD25
rs17655927	2	71827385	2p13.2	T	C	0.294781	2.61226e-09	61	0.0149	0.501747	0.00945437	MOD41	4.24191e-06	MOD38
rs772154	2	97021664	2q11.2	T	G	0.334483	1.3306e-08	21	0.1166	0.108902	0.00839115	MOD55	2.96801e-05	MOD63
rs7597495	2	112625010	2q13	G	T	0.376734	6.49654e-10	25	0.6095	0.541253	0.0373197	MOD49	3.71131e-06	MOD40
rs11692600	2	119046519	2q14.2	C	T	0.417255	1.87709e-12	14	0.6341	0.76177	0.0186897	MOD48	3.87207e-06	MOD49
rs332108	2	119440930	2q14.2	C	A	0.463014	5.73045e-12	14	0.5677	0.879413	1.27596e-05	MOD49	3.4519e-07	MOD39
rs148912137	2	145658303	2q22.3	T	C	0.239111	3.35799e-12	7	0.08762	0.624939	0.0683219	MOD43	1.59613e-05	MOD25
rs970797	2	177111819	2q31.1	T	G	0.429925	5.40707e-68	1	0.4523	3.31317e-07	4.19711e-07	MOD5	8.66865e-08	MOD38
rs10178696	2	177365619	2q31.1	A	G	0.272134	2.63872e-11	24	0.167	0.0102346	0.000688325	MOD15	8.66865e-08	MOD38
rs8176501	2	188353663	2q32.1	G	T	0.303392	4.06413e-09	32	0.4272	0.937554	0.0247437	MOD45	8.51869e-08	MOD2
rs13035389	2	199666111	2q33.1	C	T	0.459941	2.73256e-13	53	0.4466	0.0448565	0.0178089	MOD25	9.5781e-07	MOD8
rs4675617	2	200342749	2q33.1	A	G	0.16019	2.53237e-13	18	0.07802	0.206091	0.00494801	MOD25	1.65724e-05	MOD17
rs1370926	2	223030502	2q36.1	G	C	0.227621	6.52493e-62	11	0.1725	0.377649	0.0090984	MOD32	3.93521e-06	MOD63
rs7579011	2	223543633	2q36.1	A	G	0.160838	7.09004e-14	2	0.2441	0.406064	0.0103301	MOD62	6.91398e-06	MOD52
rs4686337	3	9311215	3p25.3	T	A	0.48352	2.14407e-08	11	0.3032	0.898077	0.0648555	MOD59	2.20159e-05	MOD62
rs73048344	3	24765405	3p24.2	G	A	0.123755	2.96569e-08	15	0.04335	0.310973	0.00567405	MOD20	4.8583e-07	MOD56
rs17054293	3	54724560	3p14.3	A	T	0.269934	2.81669e-24	2	0.3829	0.000603306	4.22034e-08	MOD52	9.66361e-09	MOD52
rs9310211	3	71231744	3p13	A	G	0.415742	4.64695e-22	23	0.6333	0.00577619	5.53822e-06	MOD13	1.75106e-07	MOD13
rs3072056	3	86763101	3p12.1	C	CTAAGA	0.362831	3.77276e-11	2	0.1172	0.376954	0.00426402	MOD52	3.03584e-06	MOD30
rs34199564	3	94209591	3q11.2	A	G	0.201482	2.24835e-08	30	0.03769	0.568766	0.00533652	MOD40	8.04591e-07	MOD28
rs793487	3	99495422	3q12.1	A	C	0.424188	2.0081e-08	1	0.1839	0.998755	0.0523188	MOD63	2.12411e-06	MOD35
rs1391361	3	111257405	3q13.13	T	G	0.309455	3.9361e-08	4	0.3282	0.0183745	0.00228288	MOD18	5.07707e-06	MOD29
rs7373685	3	128107020	3q21.3	C	A	0.253471	9.02116e-49	18	0.7041	0.237298	0.000940371	MOD27	1.47164e-11	MOD27
rs6795164	3	133885925	3q22.2	A	G	0.471639	1.43254e-09	1	0.7282	0.301117	0.0132565	MOD19	2.2416e-05	MOD47
rs792736	3	157482916	3q25.32	C	G	0.370215	1.22774e-16	3	0.6357	0.976716	0.00123496	MOD50	1.3781e-06	MOD31
rs58022575	3	184333169	3q27.1	G	GA	0.465792	2.83777e-26	5	0.7143	0.024256	2.11964e-06	MOD27	2.11964e-06	MOD27
rs56081252	3	184375948	3q27.1	A	G	0.358187	4.74644e-11	6	0.1675	0.597401	0.00539776	MOD39	2.11964e-06	MOD27
rs74921869	4	1013382	4p16.3	A	G	0.176415	3.50844e-11	5	0.06444	0.0783457	0.00571817	MOD48	7.7989e-06	MOD34
rs3910659	4	4537916	4p16.2	G	T	0.175783	4.45092e-09	25	0.5672	0.557554	0.00251991	MOD50	1.11756e-06	MOD46
rs13117653	4	4805454	4p16.2	A	G	0.323293	4.20039e-18	34	0.6524	0.0443412	0.0669563	MOD56	1.11756e-06	MOD46
rs7674010	4	109294589	4q25	T	C	0.284911	4.37412e-08	20	0.6281	0.0396299	0.000123775	MOD3	5.0978e-06	MOD36
rs514892	4	111843671	4q25	G	A	0.124711	2.18017e-09	15	0.3441	0.379641	0.0259989	MOD22	9.59599e-08	MOD6
rs7655723	4	120328666	4q26	A	G	0.216194	8.43704e-09	31	0.1756	0.711058	0.131785	MOD33	8.32212e-06	MOD58
rs7694450	4	121998104	4q27	A	G	0.439554	1.34007e-08	9	0.92705	0.0814089	0.0164354	MOD12	5.43739e-06	MOD11
rs6852838	4	126935475	4q28.1	G	A	0.209439	3.53959e-11	24	0.07928	0.0172543	0.0371192	MOD34	3.85565e-06	MOD8
rs62324070	4	127928593	4q28.1	A	G	0.376698	2.82075e-29	2	0.06363	0.0591999	0.00437889	MOD51	7.81024e-08	MOD51
rs9995821	4	154828366	4q31.3	C	T	0.184557	5.72076e-65	2	0.1837	2.62408e-15	2.46558e-22	MOD27	2.46558e-22	MOD27
rs4342159	4	169503180	4q32.3	A	G	0.121851	3.69763e-10	2	0.04833	0.0444188	0.00887951	MOD54	1.8584e-05	MOD4
rs4695846	4	174456858	4q34.1	A	G	0.382404	1.70765e-19	53	0.4538	0.00150965	0.00906089	MOD33	2.8932e-06	MOD57
rs3054104	4	175047506	4q34.1	CAT	C	0.319399	3.11476e-21	53	0.5471	0.878212	0.154324	MOD60	2.8932e-06	MOD57
rs4866909	5	44580193	5p12	C	A	0.436389	2.3805e-10	62	0.377	0.000425809	0.000231785	MOD2	7.15709e-06	MOD39
rs10078545	5	82124190	5q14.2	A	T	0.310809	1.67944e-09	2	0.1951	0.0304634	0.000424373	MOD31	3.08677e-06	MOD19
rs76770688	5	112985673	5q22.2	G	A	0.45187	3.72546e-09	9	0.91225	0.276713	0.00847442	MOD15	3.309e-05	MOD19
rs13182341	5	128107907	5q23.3	C	T	0.335642	3.50845e-15	6	0.2766	0.0014928	5.49783e-06	MOD7	3.58742e-06	MOD7
rs4582322	5	159509400	5q33.3	G	T	0.40713	9.51062e-09	5	0.4083	0.970108	0.00613992	MOD44	5.68431e-06	MOD13
rs6555969	5	171128464	5q35.1	T	C	0.320953	1.03499e-13	56	0.08044	0.049126	0.0292208	MOD3	1.56405e-05	MOD2
rs17073930	5	171190826	5q35.1	G	A	0.214399	4.04705e-08	2	0.3348	0.979246	0.0100853	MOD44	1.56405e-05	MOD2
rs4959652	6	2386913	6p25.2	A	G	0.399624	2.15864e-12	7	0.532	0.062893	0.0182224	MOD39	1.4321e-07	MOD45
rs7755467	6	23557322	6p22.3	C	T	0.492627	1.09545e-09	2	0.5702	0.0907814	0.0444152	MOD40	8.00223e-07	MOD24
rs9274522	6	32634373	6p21.32	T	C	0.358309	2.16144e-08	62	0.3592	0.155558	0.0263982	MOD12	1.84476e-06	MOD9
rs1520	6	39526867	6p21.2	G	A	0.383837	2.27792e-22	21	0.6365	0.057495	0.00431361	MOD32	7.89266e-06	MOD21
rs227832	6	44681257	6p21.1	C	T	0.255355	3.92729e-37	23	0.3059	0.00433656	0.0112001	MOD26	2.92653e-06	MOD9
rs73457129	6	45574050	6p21.1	A	G	0.152193	4.87086e-08	21	0.6396	0.983989	0.0191818	MOD16	7.5366e-07	MOD1
rs12055796	6	46306547	6p12.3	T	C	0.475673	1.54254e-08	22	0.5635	0.723971	0.0107764	MOD57	2.5301e-05	MOD6
rs9381923	6	50985886	6p12.3	T	C	0.256822	7.30063e-19	22	0.1706	0.000254258	0.019022	MOD50	8.95613e-06	MOD23
rs6923760	6	51685228	6p12.3	G	T	0.477301	1.02484e-10	11	0.397	0.00810357	0.0237315	MOD62	3.9517e-06	MOD5
rs4715567	6	55719867	6p12.1	A	G	0.409947	1.70882e-08	1	0.7347	0.400784	0.00385657	MOD21	1.08315e-05	MOD45
rs112411726	6	85708585	6q14.3	AATGTG	A	0.353241	1.13078e-09	15	0.5205	0.00136149	0.00387414	MOD44	2.4134e-07	MOD13
rs6568401	6	106188818	6q21	C	T	0.267704	4.63567e-08	19	0.3608	0.000138433	0.00154413	MOD61	8.21693e-06	MOD12
rs9388518	6	127103785	6q22.33	A	C	0.443293	3.69816e-21	53	0.295	0.000148728	0.000715846	MOD32	7.95776e-06	MOD36
rs519332	6	133571272	6q23.2	A	G	0.256043	6.4834e-45	28	0.09938	0.0792936	0.00164516	MOD22	2.62205e-06	MOD36
rs34729823	6	136274369	6q23.3	G	GCT	0.36831	9.19302e-21	59	0.2812	0.908273	0.0789178	MOD17	1.07735e-05	MOD18
rs2108791	7	7253520	7p22.1	T	C	0.11821	2.60082e-08	28	0.3614	0.378434	0.0750351	MOD51	8.96728e-07	MOD22
rs212672	7	18797190	7p21.1	A	T	0.245779	1.30749e-20	1	0.6976	0.00365568	1.39816e-05	MOD54	7.98874e-06	MOD46
rs2465274	7	27108127	7p15.2	A	G	0.298627	4.22214e-09	9	0.01195	0.824669	0.00571406	MOD16	1.29152e-06	MOD33
rs62443772	7	42131949	7p14.1	A	T	0.208981	5.34869e-16	22	0.135	0.401523	0.00269449	MOD35	1.60996e-05	MOD59
rs12535551	7	46677370	7p12.3	G	A	0.419663	4.60395e-11	11	0.07129	0.0460926	0.00313987	MOD34	1.77928e-05	MOD61
rs7806852	7	81218318	7q21.11	G	A	0.174343	1.88887e-08	5	0.6141	0.684155	0.00104264	MOD45	3.72949e-06	MOD43
rs7807002	7	84296811	7q21.11	A	G	0.421175	3.31883e-10	61	0.6734	0.100199	0.0141837	MOD28	7.64375e-06	MOD45
rs4296976	7	96156848	7q21.3	C	A	0.2778	7.96953e-74	54	0.5083	0.000999552	7.92761e-06	MOD36	1.30652e-06	MOD40
rs884373	7	120780483	7q31.31	T	G	0.385164	7.20779e-17	26	0.2555	0.0839321	0.0119256	MOD39	1.16481e-05	MOD46
rs798682	7	121987158	7q31.32	A	C	0.275236	8.7168e-24	45	0.1063	0.0149079	0.0188067	MOD40	2.56378e-06	MOD21
rs4732070	7	134624356	7q33	T	G	0.287056	8.94885e-09	3	0.02586	0.594177	0.0139201	MOD23	1.74825e-06	MOD46
rs6948022	7	137664771	7q33	T	C	0.114508	6.10668e-09	60	0.3721	0.114163	0.00997802	MOD63	1.56419e-07	MOD38
rs2976940	8	8279462	8p23.1	T	G	0.449769	8.57765e-09	3	0.2832	0.955329	0.03837	MOD39	9.18241e-07	MOD20
rs12114954	8	8904862	8p23.1	G	T	0.450919	1.14639e-11	2	0.6706	0.838787	0.0171753	MOD12	9.18241e-07	MOD20
rs657913	8	9882575	8p23.1	G	T	0.444956	3.96362e-10	18	0.5202	0.43992	0.00782868	MOD44	1.05296e-06	MOD44
rs5029306	8	26453105	8p21.2	T	C	0.356023	5.29279e-10	1	0.5572	0.0827877	0.0119206	MOD60	2.15719e-06	MOD60
rs149814396	8	41087109	8p11.21	T	C	0.246465	2.65144e-08	45	0.2167	0.839226	0.0038441	MOD39	5.19208e-06	MOD45
rs56252175	8	49445257	8q11.21	G	GT	0.127619	1.69431e-09	63	0.06311	0.414782	0.0147139	MOD44	2.92306e-05	MOD52
rs116867275	8	52584738	8q11.22	C	A	0.0141737	1.94806e-08	1	NA	NA	NA	NA	7.53591e-06	MOD55
rs1588405	8	78588654	8q21.12	C	A	0.446246	1.32315e-08	60	0.4178	0.761102	0.0117347	MOD19	3.5273e-07	MOD24
rs139016242	8	99244975	8q22.2	TA	T	0.266131	2.85705e-10	63	0.3751	0.0085779	0.00468753	MOD20	7.79075e-06	MOD7
rs60373317	8	100509357	8q22.2	A	C	0.185177	1.96516e-09	1	0.241	0.229583	0.00759701	MOD40	1.13144e-05	MOD55
rs10089785	8	109599969	8q23.1	C	T	0.382291	2.57831e-08	10	0.762	0.0102994	0.00224449	MOD52	8.28991e-06	MOD52
rs2245221	8	116624879	8q23.3	G	A	0.427835	1.88108e-08	48	0.4115	0.730939	0.0168427	MOD40	3.11114e-05	MOD54
rs11337200	8	116713794	8q23.3	AT	A	0.236893	7.02548e-13	2	0.5486	0.99913	0.092128	MOD55	3.11114e-05	MOD54
rs7843236	8	121980512	8q24.12	T	A	0.464593	9.54389e-10	2	0.4042	0.00610086	0.000797836	MOD63	3.34622e-06	MOD10
rs2581548	8	122256121	8q24.12	A	G	0.453409	8.53303e-11	2	0.02822	0.0229786	0.0705842	MOD51	3.34622e-06	MOD10
rs871502	8	129863648	8q24.21	G	C	0.206005	3.32918e-08	4	0.5688	0.414671	0.00155498	MOD2	6.80581e-06	MOD1
rs7859005	9	1128641	9p24.3	G	A	0.40891	2.68612e-10	57	0.3405	0.723439	0.00733674	MOD23	3.70292e-06	MOD8
rs10758593	9	4292083	9p24.2	A	G	0.397128	5.97421e-14	3	0.5243	0.195821	2.95354e-05	MOD48	5.79289e-07	MOD48
rs303751	9	14480820	9p22.3	A	G	0.244072	2.81586e-12	38	0.4151	0.0579962	0.00645505	MOD36	9.6285e-06	MOD35
rs10962767	9	16958463	9p22.2	C	A	0.437351	5.11659e-14	2	0.02165	0.107869	0.00847566	MOD54	3.68817e-06	MOD48
rs2230578	9	94485928	9q22.31	C	T	0.314735	5.84722e-09	2	0.2272	0.000109303	0.0011566	MOD3	2.07436e-05	MOD15
rs12553508	9	96446445	9q22.31	T	C	0.278267	5.94047e-09	3	0.2553	0.470108	0.00281851	MOD63	1.6083e-06	MOD42
rs145965565	9	98273305	9q22.32	G	T	0.0867785	1.19827e-14	44	0.01497	0.499614	0.0109093	MOD58	5.25499e-06	MOD8
rs1999464	9	111371123	9q31.3	C	T	0.279965	1.74018e-34	7	0.2467	0.137106	0.00895116	MOD38	4.42973e-06	MOD14
rs10448285	9	129397014	9q33.3	T	C	0.344044	1.3793e-10	57	0.2114	0.615213	0.061781	MOD36	1.94205e-05	MOD7
rs1902713	10	48442078	10q11.22	C	T	0.368716	1.77744e-08	20	0.7304	0.106111	0.0106195	MOD58	7.85888e-06	MOD45
rs9633535	10	63836088	10q21.2	T	C	0.407456	4.32814e-11	5	0.1257	0.296783	0.00582798	MOD61	7.48846e-06	MOD8
rs138458666	10	76358087	10q22.2	T	TA	0.427035	7.49936e-09	2	0.03827	0.815635	0.0504356	MOD57	5.16113e-05	MOD44
rs1907342	10	78163768	10q22.3	G	A	0.158965	6.27909e-19	9	0.7786	0.000916672	1.52257e-05	MOD60	4.7592e-07	MOD15
rs1536446	10	97259560	10q24.1	G	A	0.409932	3.99945e-08	45	0.4311	0.60218	0.00155949	MOD25	1.1295e-05	MOD19
rs11190970	10	103128332	10q24.32	A	G	0.196947	7.47321e-09	45	0.04281	0.622749	0.110634	MOD11	9.42393e-06	MOD37
rs242983	10	119276361	10q26.11	A	G	0.123544	1.84622e-20	1	0.3185	1.00465e-08	3.41354e-11	MOD1	1.5472e-11	MOD1
rs34988394	10	119738984	10q26.11	T	C	0.209137	5.46352e-14	62	0.01062	0.456798	0.029547	MOD16	1.5472e-11	MOD1
rs1696840	10	123343909	10q26.13	G	T	0.352854	2.8286e-08	34	0.3351	0.22215	0.0256371	MOD5	7.68159e-07	MOD28
rs6578283	11	2673575	11p15.5	G	A	0.289885	2.53498e-10	9	0.526	0.0831275	0.00238876	MOD62	1.35119e-06	MOD33
rs34121257	11	16224877	11p15.1	GA	G	0.484283	1.08582e-08	7	0.5935	0.710678	0.0717033	MOD59	2.48012e-05	MOD18
rs7121535	11	44336938	11p11.2	T	C	0.44086	4.7054e-09	1	0.0296	0.83281	0.0219409	MOD39	8.07297e-06	MOD30
rs10838269	11	44378010	11p11.2	C	T	0.272478	8.93248e-15	30	0.1532	0.148471	0.00790345	MOD7	8.64887e-06	MOD15
rs10743452	12	8841413	12p13.31	A	G	0.196051	4.73068e-08	7	0.09952	0.760279	0.00503105	MOD28	3.39841e-06	MOD53
rs11049359	12	28279773	12p11.22	C	T	0.298945	4.24633e-19	1	NA	NA	NA	NA	6.31101e-07	MOD52
rs7970054	12	59314712	12q14.1	C	T	0.115545	6.56322e-11	7	0.05382	0.139654	0.0329158	MOD8	9.5959e-06	MOD4
rs60493340	12	65856151	12q14.3	G	T	0.448829	4.00117e-19	3	0.3008	0.0325784	0.00032129	MOD32	5.52552e-12	MOD1
rs11175967	12	66321344	12q14.3	G	C	0.224955	2.14985e-15	28	0.5099	2.45574e-07	5.15173e-11	MOD1	5.52552e-12	MOD1
rs2695152	12	77927796	12q21.2	G	A	0.329004	1.28054e-08	35	0.5284	0.836851	0.000805726	MOD25	2.70779e-06	MOD6
rs10160931	12	78216016	12q21.2	G	T	0.382237	8.83252e-14	13	0.1763	0.473257	0.00140701	MOD54	2.70779e-06	MOD6
rs58687115	12	84199728	12q21.31	C	CT	0.483779	5.33652e-11	12	0.1411	0.360581	0.0281427	MOD16	4.36861e-06	MOD10
rs4385969	12	84395428	12q21.31	A	G	0.384363	2.48969e-11	2	0.6164	0.764551	0.0513157	MOD30	4.36861e-06	MOD10
rs11609649	12	85576492	12q21.31	A	G	0.178127	6.57385e-29	1	NA	NA	NA	NA	1.81271e-15	MOD30
rs10779162	12	85881917	12q21.31	T	G	0.0790387	4.12902e-17	9	0.8788	0.581155	0.0356831	MOD32	1.81271e-15	MOD30
rs2098990	12	115419855	12q24.21	A	C	0.463553	6.69962e-25	5	0.5176	2.04413e-09	3.86466e-05	MOD55	2.13914e-08	MOD14
rs66516258	13	80489124	13q31.1	T	TTA	0.190583	1.25178e-09	11	0.2696	0.796569	0.00344947	MOD33	3.25536e-05	MOD31
rs11842203	13	95508654	13q32.1	G	A	0.0538749	7.20749e-11	5	NA	NA	NA	NA	1.67445e-06	MOD45
rs9524742	13	95650055	13q32.1	T	C	0.420119	3.05526e-15	1	0.1523	0.00844749	0.00210359	MOD22	1.67445e-06	MOD45
rs2390383	13	100974098	13q32.3	A	C	0.411483	1.99307e-08	14	0.4008	0.88536	0.0265531	MOD33	1.4181e-08	MOD59
rs9558696	13	106821580	13q33.2	T	C	0.103101	9.59865e-10	2	0.02095	0.0238293	0.0814549	MOD15	5.30054e-07	MOD5
rs1411551	13	110373035	13q34	A	T	0.25545	3.7995e-12	20	0.01001	0.283245	0.00988563	MOD42	4.32756e-07	MOD41
rs59081965	14	37513151	14q13.3	TC	T	0.329913	7.466e-09	1	0.4702	0.91942	0.00413711	MOD56	3.65743e-06	MOD42
rs12878658	14	54077802	14q22.1	A	G	0.166357	4.59746e-09	11	0.04264	0.0202072	0.0556791	MOD27	3.19511e-05	MOD27
rs10047930	14	59461017	14q23.1	T	C	0.449718	1.61809e-08	53	0.3382	0.0953283	0.00571039	MOD25	2.55114e-06	MOD63
rs12881623	14	61564837	14q23.1	C	T	0.310799	1.02514e-09	18	0.6976	0.268421	0.0361112	MOD6	1.97179e-06	MOD31
rs12890110	14	68781595	14q24.1	C	T	0.366622	2.17204e-09	17	0.8599	0.211308	0.0770885	MOD33	1.4078e-06	MOD48
rs1542448	14	98873074	14q32.2	A	G	0.357071	1.48589e-13	7	0.1932	0.0130885	0.00933532	MOD50	1.6695e-06	MOD19
rs76810699	14	99018688	14q32.2	A	G	0.131819	2.54425e-09	1	0.03281	0.194524	0.127388	MOD42	1.6695e-06	MOD19
rs1257585	14	99521392	14q32.2	A	C	0.32544	7.37462e-11	56	0.06902	0.324811	0.00944032	MOD2	9.10265e-07	MOD63
rs148375239	15	33002864	15q13.3	T	C	0.481645	4.70347e-10	53	0.3149	0.0114396	0.00322487	MOD8	3.15016e-06	MOD15
rs34961041	15	36552603	15q14	A	G	0.396084	9.44253e-14	31	0.2357	0.0319619	0.000306015	MOD23	7.6786e-06	MOD42
rs2306022	15	68628163	15q23	T	C	0.0810867	5.85957e-09	15	NA	NA	NA	NA	3.52623e-06	MOD33
rs34430707	15	71755645	15q23	G	A	0.199007	6.87065e-12	2	0.01247	0.51098	0.043008	MOD45	3.03042e-05	MOD41
rs112087864	15	71860977	15q23	T	C	0.304206	7.09804e-11	24	0.04364	0.248853	0.0550956	MOD47	3.03042e-05	MOD41
rs2401176	15	84578364	15q25.2	G	T	0.474309	9.12235e-11	11	0.1829	0.604952	0.105002	MOD44	3.1372e-05	MOD35
rs9923447	16	53643103	16q12.2	T	C	0.229709	5.87339e-27	9	0.6995	0.000660646	4.55188e-05	MOD61	2.20325e-07	MOD61
rs62051935	16	86495862	16q24.1	A	G	0.17879	1.99949e-13	19	0.1369	0.612171	0.000693177	MOD14	2.02653e-06	MOD6
rs2760734	17	2027644	17p13.3	T	C	0.168263	2.05348e-09	51	0.2461	0.432	0.0161034	MOD54	5.17626e-06	MOD19
rs9899183	17	7452977	17p13.1	C	T	0.262954	8.13301e-13	26	0.3088	0.318243	0.061341	MOD17	6.66455e-06	MOD46
rs7218433	17	54304717	17q22	G	T	0.243512	1.1095e-21	7	0.5046	0.125574	0.00069422	MOD46	9.16487e-07	MOD55
rs227727	17	54776955	17q22	T	A	0.442965	1.00083e-16	38	0.7851	0.201736	0.00133837	MOD2	9.16487e-07	MOD55
rs9893705	17	59269555	17q23.2	T	C	0.188101	8.31753e-12	49	0.3596	0.0175706	0.0137373	MOD5	4.38939e-07	MOD32
rs34439270	17	67727076	17q24.3	A	ATGT	0.48842	8.14748e-09	3	0.5806	0.295253	0.038298	MOD11	1.35291e-06	MOD46
rs9908442	17	69137948	17q24.3	A	G	0.395868	3.30079e-46	5	0.1274	0.155203	0.000159124	MOD10	5.2828e-06	MOD1
rs9302943	17	70034189	17q24.3	A	T	0.438136	9.84338e-47	44	0.4076	0.033746	0.000131882	MOD55	3.51869e-07	MOD37
rs2359442	18	41543937	18q12.3	A	G	0.491182	3.33027e-09	22	0.5908	0.416805	0.153691	MOD37	2.00835e-05	MOD52
rs11665450	18	52844766	18q21.2	T	C	0.49582	1.2658e-10	46	NA	NA	NA	NA	2.916e-06	MOD39
rs634687	18	72906960	18q22.3	G	T	0.0532276	2.54101e-11	11	0.09566	0.306752	0.00575437	MOD24	2.58985e-07	MOD20
rs287104	19	34290995	19q13.11	G	A	0.343772	3.83828e-37	5	0.2757	0.314092	0.00308644	MOD59	3.63914e-06	MOD62
rs6139982	20	6411560	20p12.3	A	G	0.432281	3.86118e-09	60	0.351	0.77895	0.037012	MOD62	1.13066e-05	MOD9
rs116792	20	9971408	20p12.2	G	A	0.438	4.96988e-11	11	0.6904	0.228668	0.00308392	MOD55	6.75312e-06	MOD47
rs6047635	20	21781625	20p11.22	T	G	0.0916378	2.29839e-12	11	0.5378	0.1544	0.0407502	MOD58	1.48725e-08	MOD54
rs6047637	20	21785073	20p11.22	C	T	0.258161	4.53132e-20	31	0.1878	0.0538244	0.00799367	MOD58	1.48725e-08	MOD54
rs6113624	20	22286430	20p11.22	A	G	0.389439	7.13134e-17	21	0.1115	0.0458604	9.46706e-05	MOD2	1.48725e-08	MOD54
rs1474738	20	31380309	20q11.21	A	G	0.382472	2.89784e-10	1	0.1845	0.66595	0.00811021	MOD10	2.01415e-06	MOD60
rs877313	20	38082252	20q12	C	T	0.474208	1.14903e-29	2	0.05746	0.813432	0.00302331	MOD37	4.00948e-06	MOD29
rs6022641	20	52274008	20q13.2	C	T	0.326576	2.99672e-10	36	0.7854	0.0166202	0.0002268	MOD6	2.05206e-05	MOD46
rs4811827	20	55798240	20q13.31	C	T	0.437188	2.87693e-09	23	0.4	0.474492	0.022729	MOD44	8.38009e-06	MOD39
rs736702	22	45725600	22q13.31	G	A	0.261981	1.91238e-08	30	0.8717	0.643833	0.0167452	MOD35	2.47565e-06	MOD58
rs6529847	23	5578860	Xp22.32	T	A	0.170974	4.23073e-08	28	0.1561	0.121222	0.0156593	MOD63	1.09134e-06	MOD27
rs2520378	23	69017223	Xq13.1	G	A	0.23088	3.64825e-10	1	0.2213	0.963921	0.0602731	MOD61	3.14087e-06	MOD13
rs1045686	23	92927634	Xq21.32	G	C	0.342265	4.83599e-08	60	0.513	0.429793	0.0363812	MOD47	1.13372e-06	MOD33
rs11167418	23	114665177	Xq23	C	T	0.46986	3.92994e-08	2	0.889	0.663419	0.00639872	MOD4	3.26758e-08	MOD58
rs4829906	23	136955404	Xq26.3	A	G	0.399884	9.50153e-14	63	0.1186	0.078652	0.0184429	MOD39	2.05573e-05	MOD41
P value highlighted with bold format indicates replication association after Bonferroni correction
